# Supplementary material
Source: Springer Nature journal article supplement (https://www.springermedizin.de/resource/supplementary/12913_2012_2534_MOESM1_ESM.pdf/9530852)
Supplement: MOESM1 [file 9530852]

# Regional variation of site of death at home in Switzerland 2007–2011

(CH mean = 26.6%)

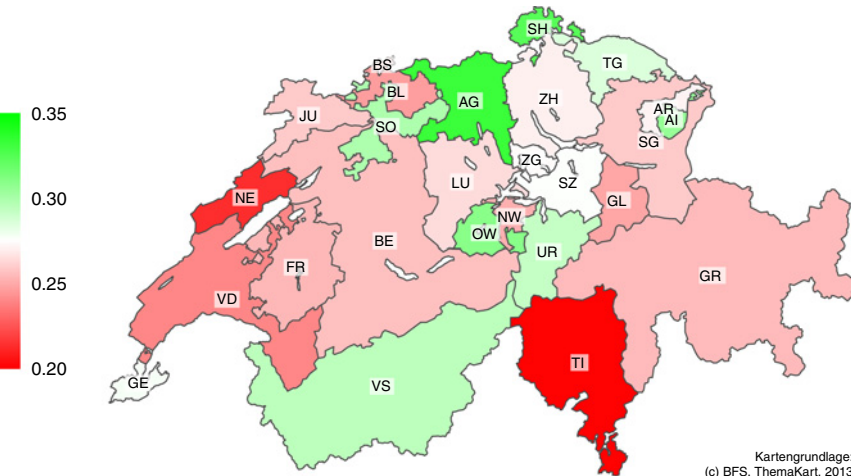

The 26 Swiss cantons are:

Aargau (AG), Appenzell Outer-Rhodes (AR), Appenzell Inner-Rhodes (AI), Basel-Land (BL), Basel-City (BS), Berne (BE), Fribourg (FR), Geneva (GE), Glarus (GL), Grisons (GR), Jura (JU), Lucerne (LU), Neuchâtel (NE), Nidwalden (NW), Obwalden (OW), Schaffhausen (SH), Schwyz (SZ), Solothurn (SO), St. Gall (SG), Thurgau (TG), Ticino (TI), Uri (UR), Vaud (VD), Valais (VD), Zug (ZG), Zurich (ZH).

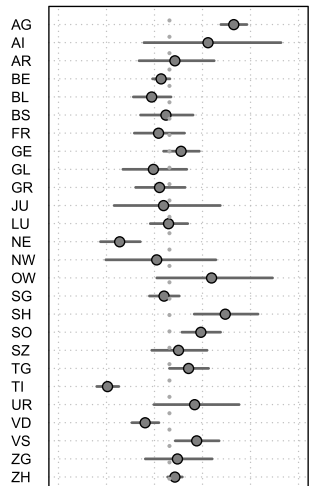

0.15 0.20 0.25 0.30 0.35 0.40

● estimate — 95%–CI
